# Supplementary material for: Amyloid fibrils in superstructures – local ordering revealed by polarization analysis of two-photon excited autofluorescence
Source: Royal Society of Chemistry journal article supplement (doi:10.1039/d1bm01768c), 2022-01-01
Supplement: d1bm01768c1.pdf [file d1bm01768c1.pdf]

## Supporting information

# Amyloid fibrils in superstructures – local ordering revealed by polarization analysis of two-photon excited autofluorescence

*Patryk Obstarczyk<sup>1</sup>, Maciej Lipok<sup>1</sup>, Andrzej Żak<sup>2</sup>, Paweł Cwynar<sup>1</sup>, Joanna Olesiak-Bańska<sup>1\*</sup>*

<sup>1</sup> – Advanced Materials Engineering and Modelling Group, Faculty of Chemistry, Wrocław University of Science and Technology, Wybrzeże Wyspiańskiego 27, 50-370 Wrocław, Poland

<sup>2</sup> – Electron Microscopy Laboratory, Faculty of Mechanical Engineering, Wrocław University of

a)

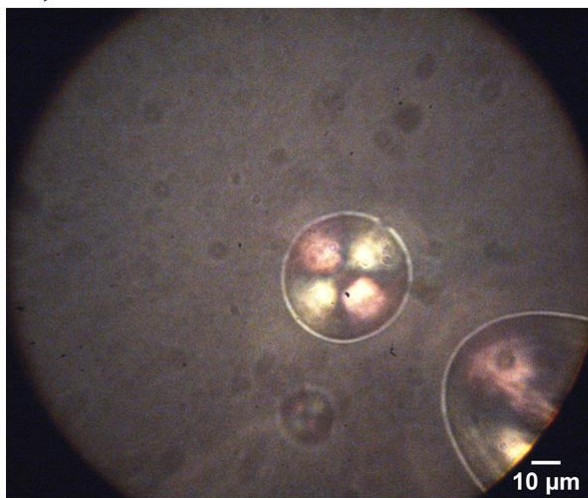

b)

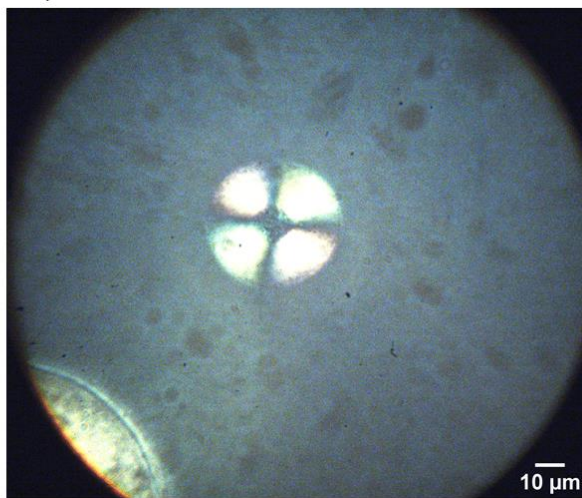

**Fig. S1.** Polarized light optical microscopy images of a) unlabeled and b) ThT-labelled spherulites with crossed polarizers.

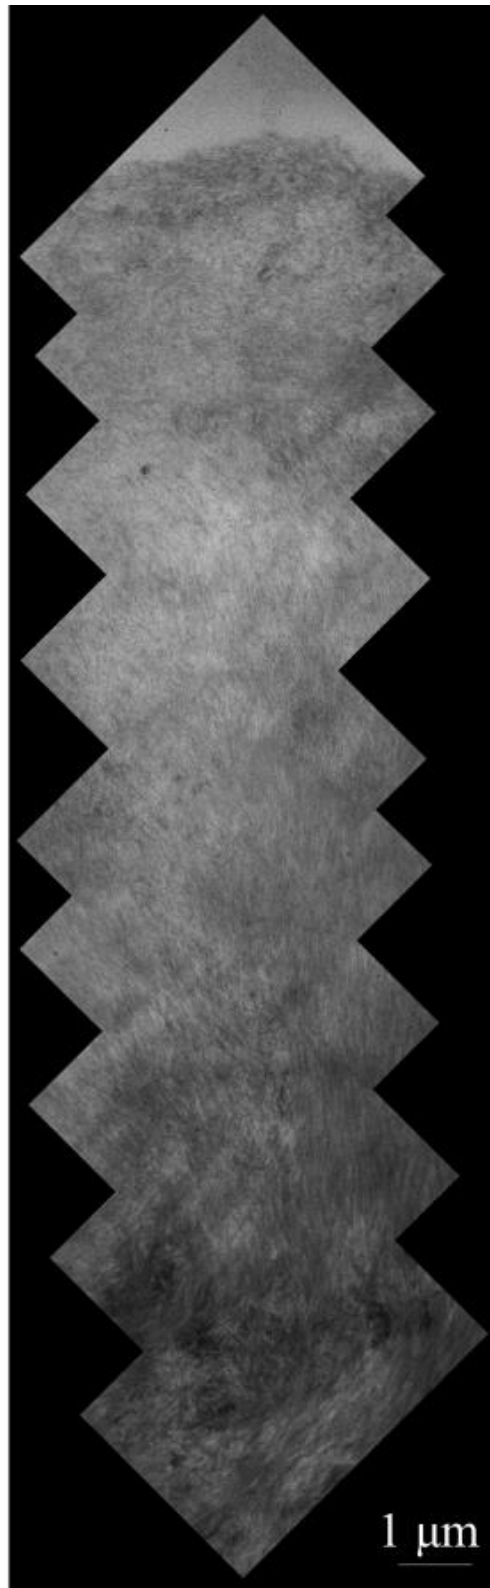

**Fig. S2.** Panoramic TEM image of entire spherulite structure. Spherulite diameter imaged under TEM can range from 5 to 15 μm and was chosen based on technical requirements, i.e. TEM grid size.
